# Supplementary material for: A high performance and long-cycling bi-functional carbon electrode derived from Phyllanthus emblica (amla) for potassium ion batteries and supercapacitors
Source: Royal Society of Chemistry journal article supplement (doi:10.1039/d3nj04362b), 2023-12-01
Supplement: d3nj04362b1.pdf [file d3nj04362b1.pdf]

## Supporting Information

### **High Performance and Long-cycling Bi-functional Carbon Electrodes Derived from Phyllanthus emblica (Amla) for Potassium ion Batteries and Supercapacitors**

Chandra Sekhar Bongu <sup>1\*</sup>, Arthi Gopalakrishnan <sup>1</sup>, and Chandra Shekhar Sharma <sup>1</sup>

<sup>1</sup> Creative & Advanced Research Based on Nanomaterials (CARBON) Laboratory,  
Department of Chemical Engineering, Indian Institute of Technology Hyderabad,  
Kandi-502285, Telangana, India

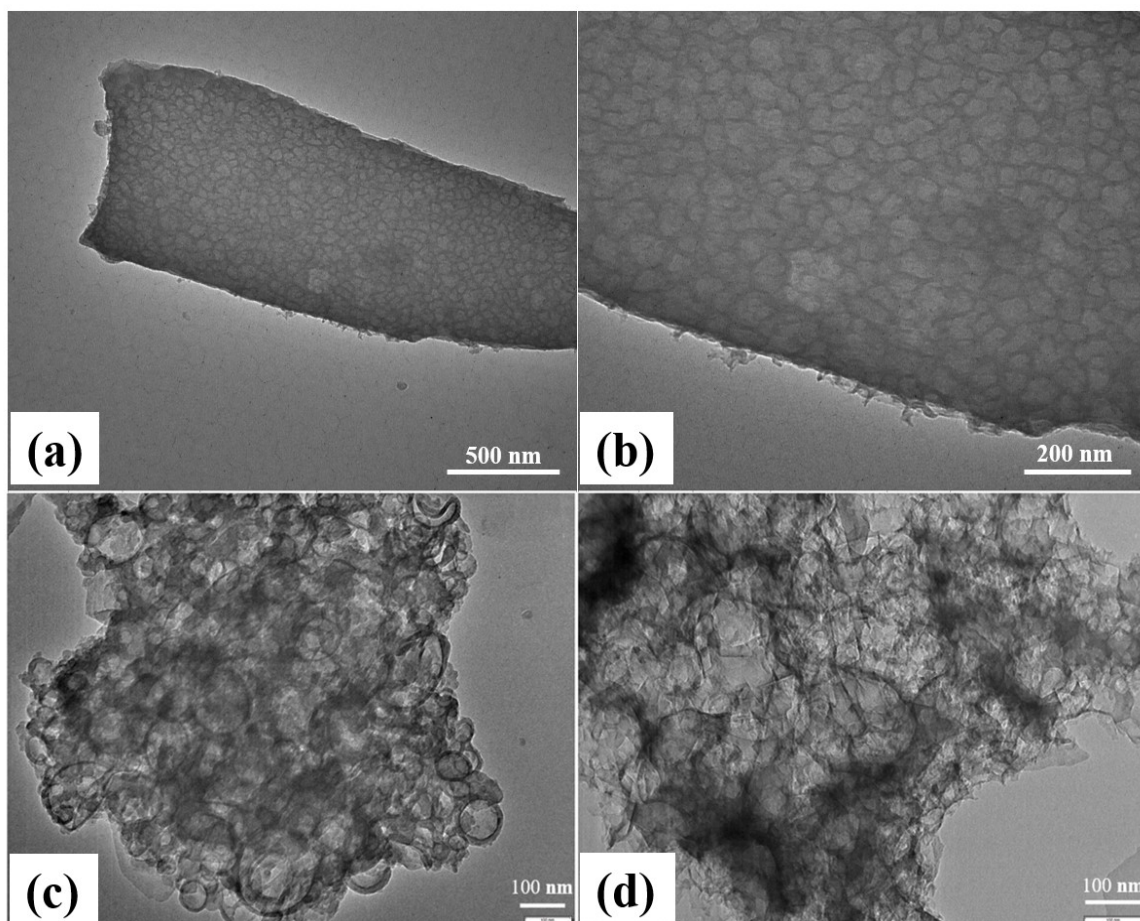

**Figure S1:** TEM images of AAC.

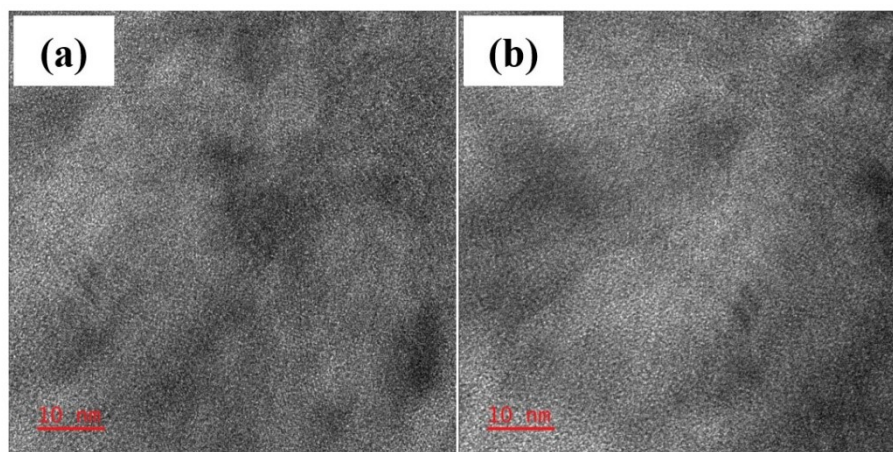

**Figure S2:** HRTEM images of AAC.

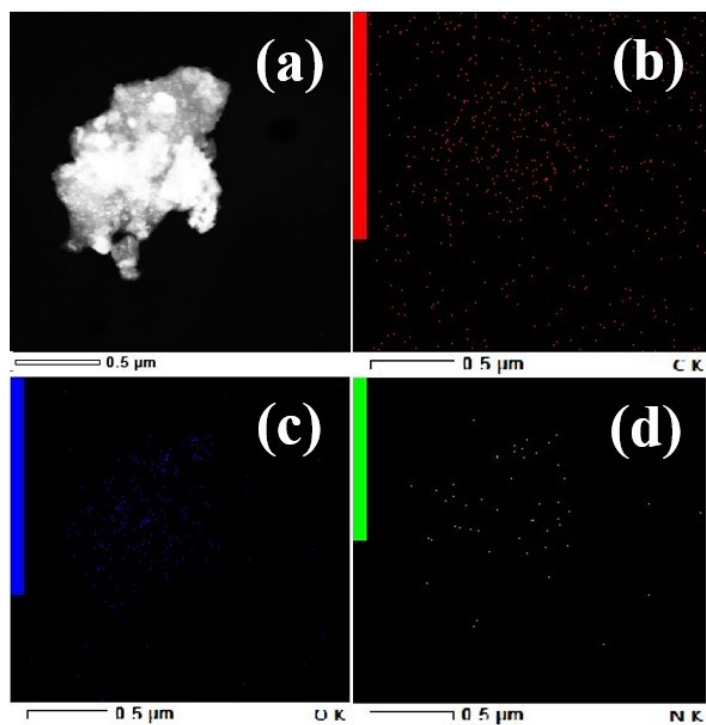

**Figure S3.** (a) SEM image and elemental mapping of AAC (b) Carbon, (c) Oxygen and (d) Nitrogen.

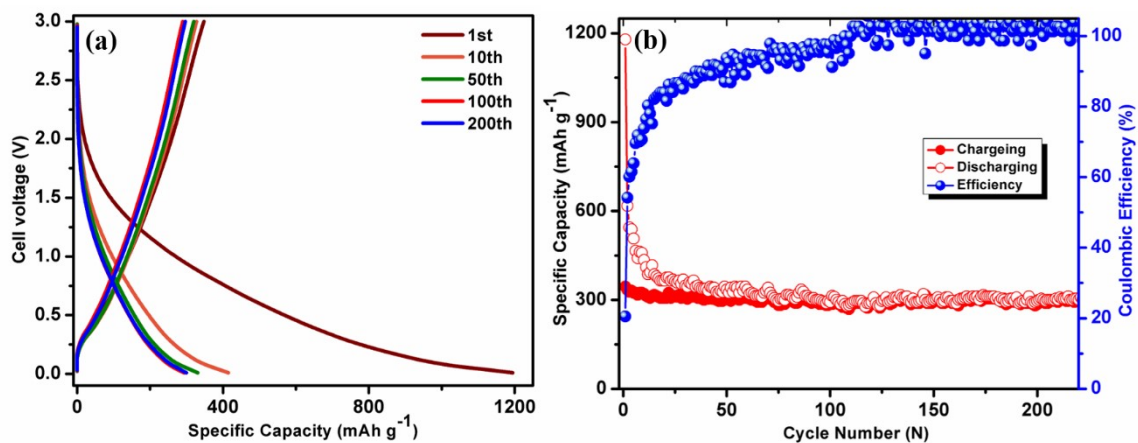

**Figure S4.** (a) Selected charge-discharge profiles and (b) long-term cycling performance of amla derived carbon at  $100 \text{ mA g}^{-1}$ .

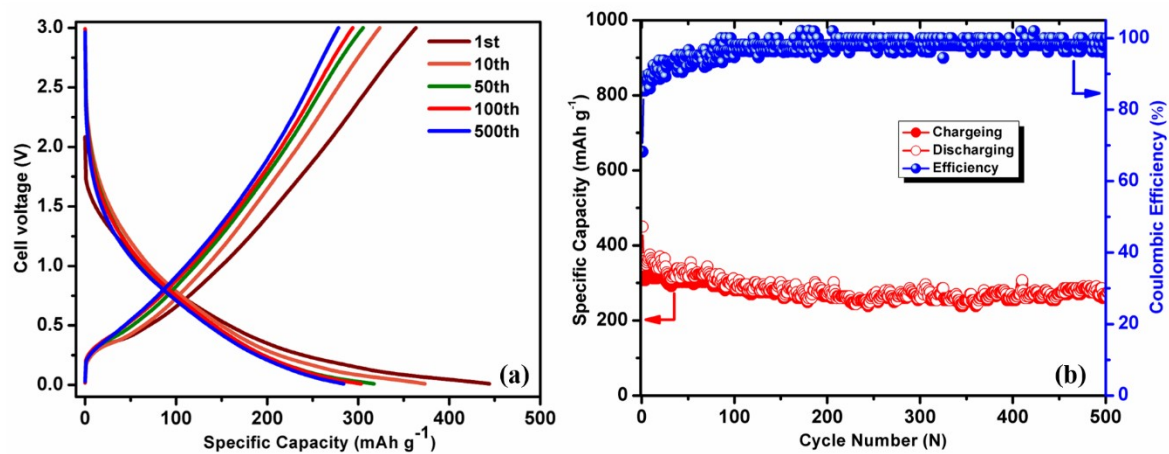

**Figure S5.** (a) Selected charge-discharge profiles and (b) long-term cycling performance of amla derived carbon at 200 mA g<sup>-1</sup>.

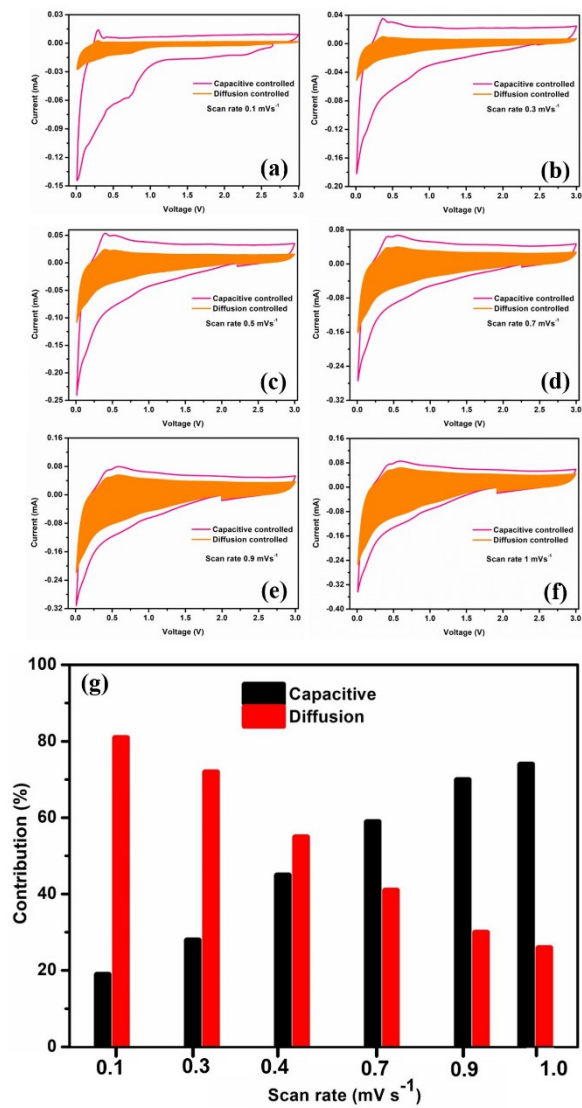

**Figure S6.** Separation of capacitance and diffusion capacity from the CV and the contribution ratios of capacitance and diffusion capacity with the different sweeping rate changing from 0.1–1.0 mV s<sup>-1</sup> for AAC ((a) 0.1 mV s<sup>-1</sup>, (b) 0.3 mV s<sup>-1</sup>, (c) 0.5 mV s<sup>-1</sup>, (d) 0.7 mV s<sup>-1</sup>, (e) 0.9 mV s<sup>-1</sup>, and (f) 1.0 mV s<sup>-1</sup>) and (g), respectively.
